# Supplementary material for: Water-Soluble Single-Benzene Chromophores: Excited State Dynamics and Fluorescence Detection
Source: MDPI journal article supplement (doi:10.3390/molecules27175522), 2022-08-27
Supplement: s1 [file s1]

Supporting Information  
*for*  
**Water-Soluble Single-Benzene Chromophores: Excited State  
Dynamics and Fluorescence Detection**

Yingge Fan <sup>1</sup>, Jin Ma <sup>1</sup>, Huijing Liu <sup>2,\*</sup> and Taihong Liu <sup>2,\*</sup>

<sup>1</sup> Department of Chemical Engineering, Shaanxi Institute of Technology,  
Xi'an 710300, China

<sup>2</sup> Key Laboratory of Applied Surface and Colloid Chemistry of Ministry of  
Education, School of Chemistry and Chemical Engineering,  
Shaanxi Normal University, Xi'an 710062, China

\* Correspondence: hjliu@snnu.edu.cn (H.L.); liuth121@snnu.edu.cn (T.L.).

**Contents:**

|                                                                          |     |
|--------------------------------------------------------------------------|-----|
| 1. Supplementary UV-vis absorption and emission figures.....             | S2  |
| 2. Supplementary transient absorption (TA) spectra and data.....         | S3  |
| 3. Additional sensing performances.....                                  | S5  |
| 4. Determination of the detection limits.....                            | S8  |
| 5. Performance comparison of present probes with the reported works..... | S9  |
| 6. NMR spectra of the compounds.....                                     | S10 |
| 7. HRMS spectra of the compounds.....                                    | S12 |

## 1. Supplementary figures

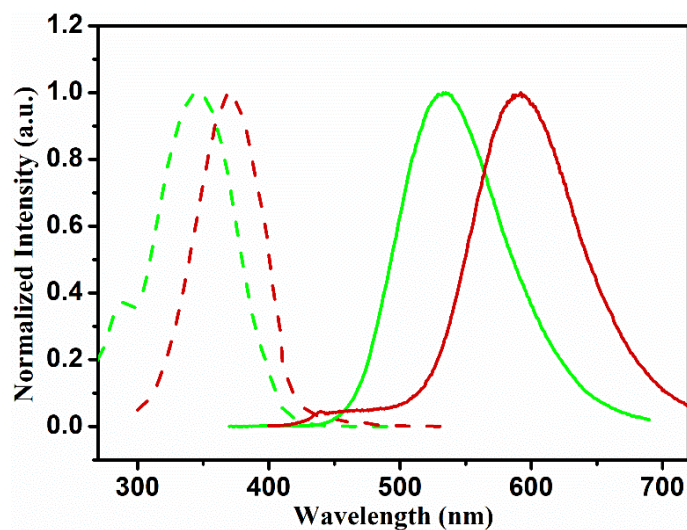

**Figure S1.** Normalized fluorescence excitation and emission spectra of **DAPA** (red lines) and **DAP-Na** (green lines) in water ( $c = 20.0 \mu\text{M}$ ).

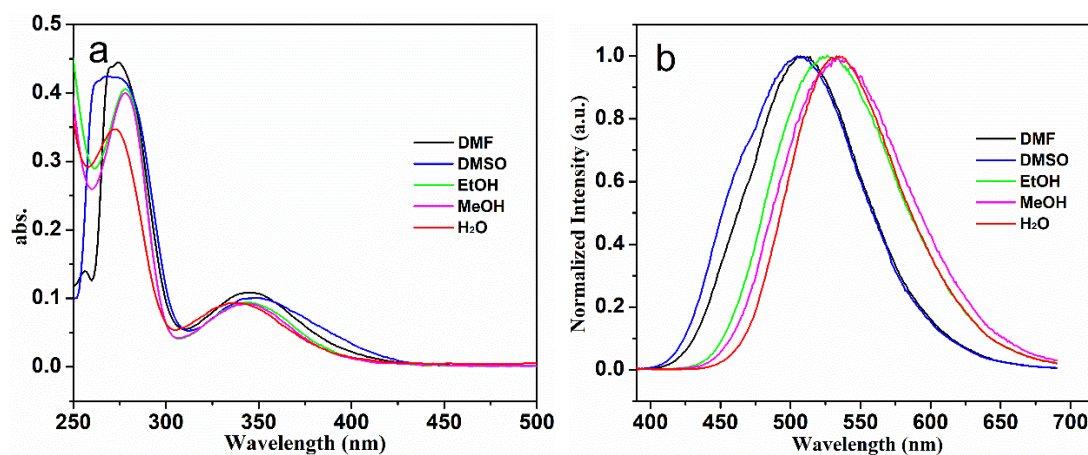

**Figure S2.** (a) UV-vis absorption and (b) normalized fluorescence emission spectra of **DAP-Na** in various solvents ( $\lambda_{\text{ex}} = 350 \text{ nm}$ ;  $c = 20.0 \mu\text{M}$ ).

## 2. Supplementary transient absorption (TA) spectra and data

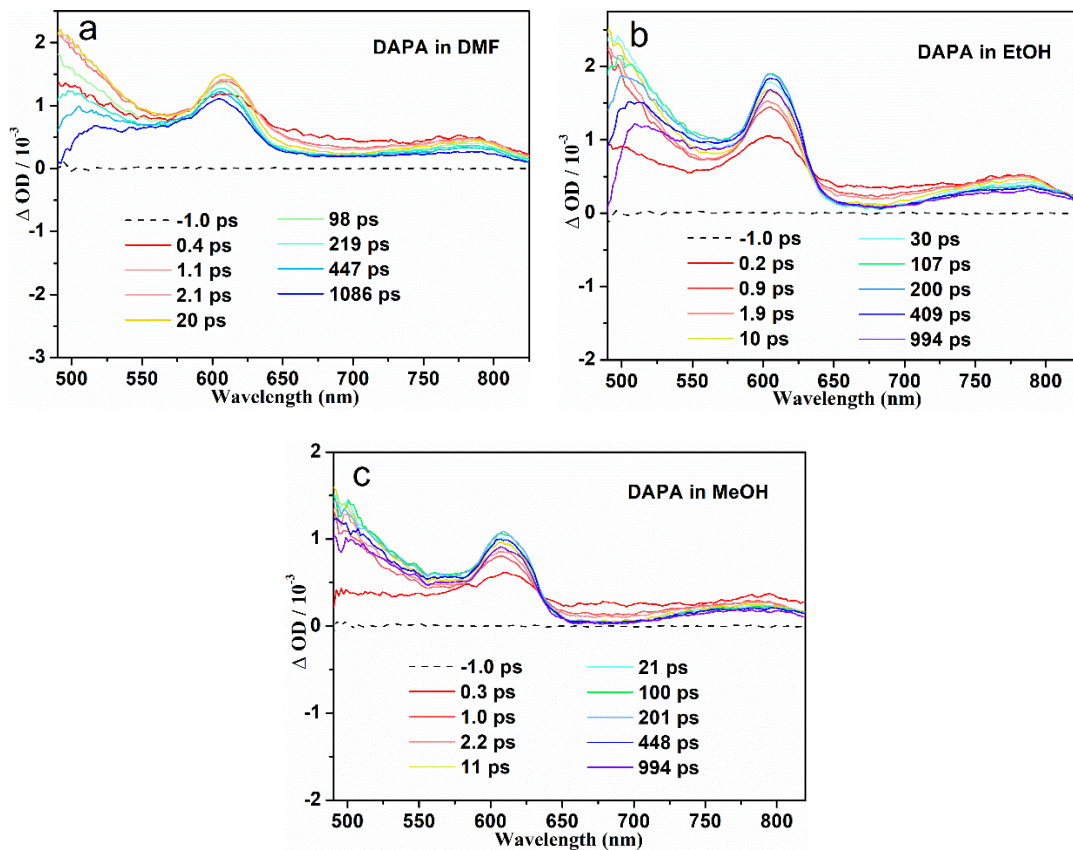

**Figure S3.** Femtosecond transient absorption spectra of **DAPA** in different solvents (DMF, ethanol and MeOH) upon excitation at fs-420 nm.

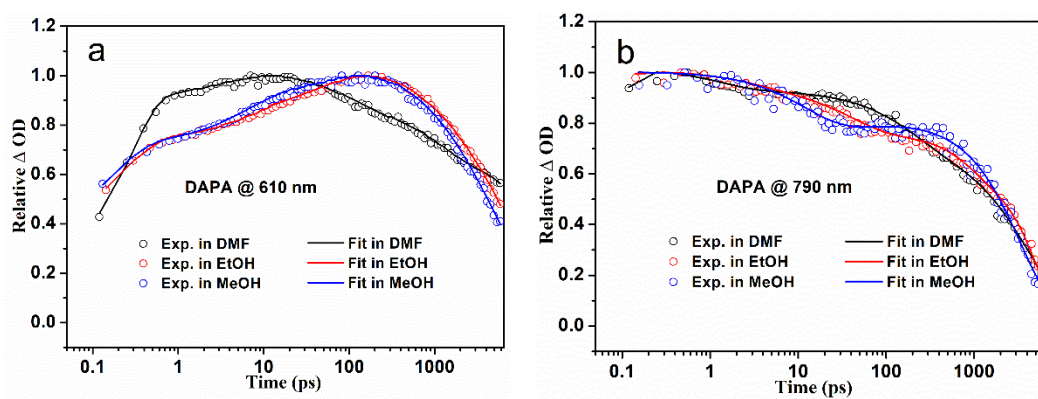

**Figure S4.** Experimental decay curves of **DAPA** in transient absorption and their fitting kinetic traces probed at 610 nm and 790 nm in three kinds of different solvents.

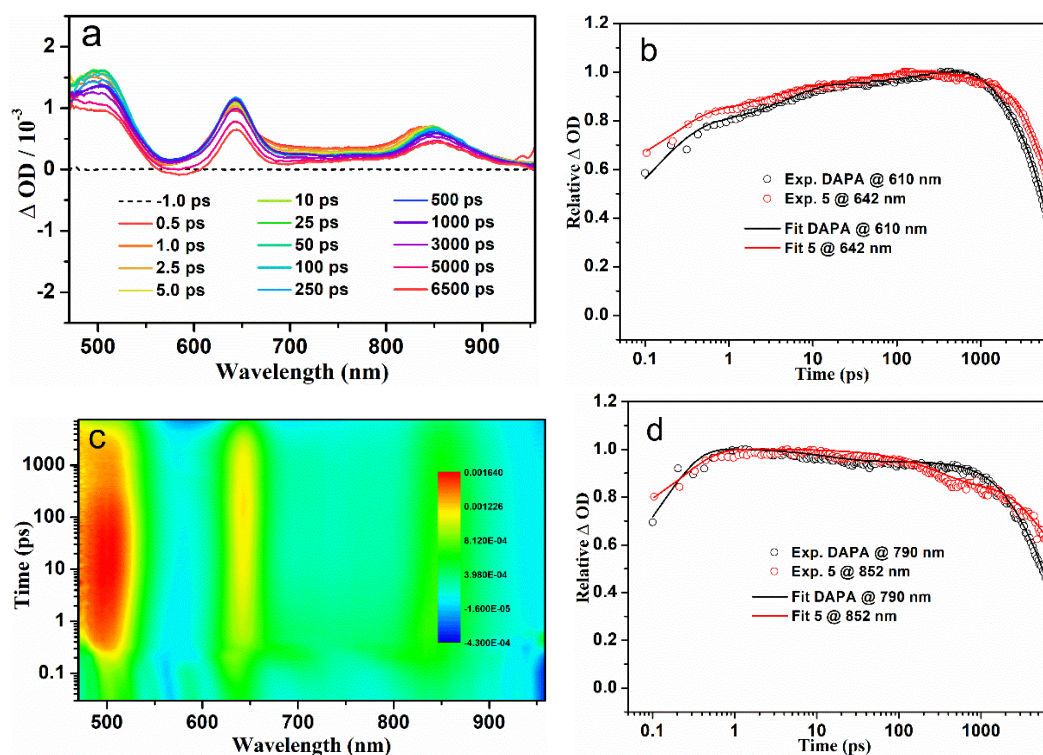

**Figure S5.** (a) Femtosecond transient absorption spectra of **5** upon excitation at fs-420 nm at various time delays in DMSO and (c) its species-associated spectra plots; (b) and (d) experimental decay curves in transient absorption of **DAPA** and **5** probed at different wavelengths and their fitting kinetic traces.

**Table S1.** Time constants of multiple exponential fitting of femtosecond TA data of different system, with relative amplitudes given for **DAPA** and **5** in different solvents.

| Entry              | Solvent | $\tau_1$ (ps) | A1   | $\tau_2$ (ps) | A2  | $\tau_3$ (ns) | A3  |
|--------------------|---------|---------------|------|---------------|-----|---------------|-----|
| <b>DAPA@610 nm</b> | DMF     | 4.6           | -16% | 75            | 35% | 3.3           | 54% |
|                    | DMSO    | 4.7           | -11% | 212           | 12% | 3.4           | 72% |
|                    | EtOH    | 6.4           | -10% | 56            | 9%  | 3.2           | 81% |
|                    | MeOH    | 5.4           | 7%   | 58            | 14% | 3.6           | 79% |
| <b>DAPA@790 nm</b> | DMF     | 4.5           | 13%  | 167           | 22% | 3.3           | 65% |
|                    | DMSO    | 7.9           | -6%  | 145           | 26% | 3.1           | 68% |
|                    | EtOH    | 5.7           | 12%  | 138           | 30% | 3.1           | 58% |
|                    | MeOH    | 4.3           | 9%   | 115           | 17% | 2.8           | 74% |
| <b>5@642 nm</b>    | DMSO    | 3.1           | 7%   | 92            | 25% | 2.6           | 68% |
| <b>5@852 nm</b>    | DMSO    | 6.1           | 9%   | 107           | 31% | 3.2           | 60% |



### 3. Additional sensing performances

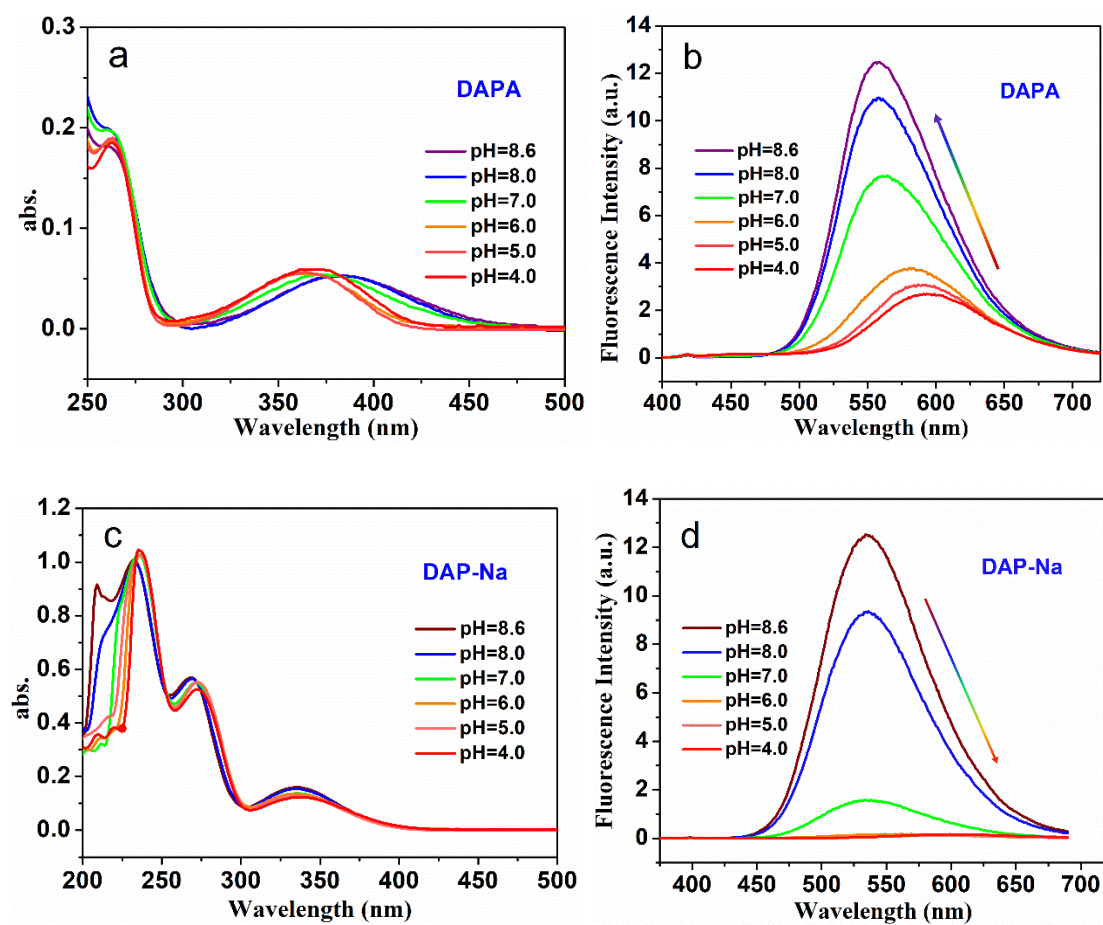

**Figure S6.** UV-vis absorption (a, c) and fluorescence emission spectra (b, d) of **DAPA** and **DAP-Na** in Britton-Robinson (B-R) buffer at different pH values (**DAPA**:  $\lambda_{\text{ex}} = 365$  nm, **DAP-Na**:  $\lambda_{\text{ex}} = 350$  nm,  $c = 20.0$   $\mu\text{M}$ ).

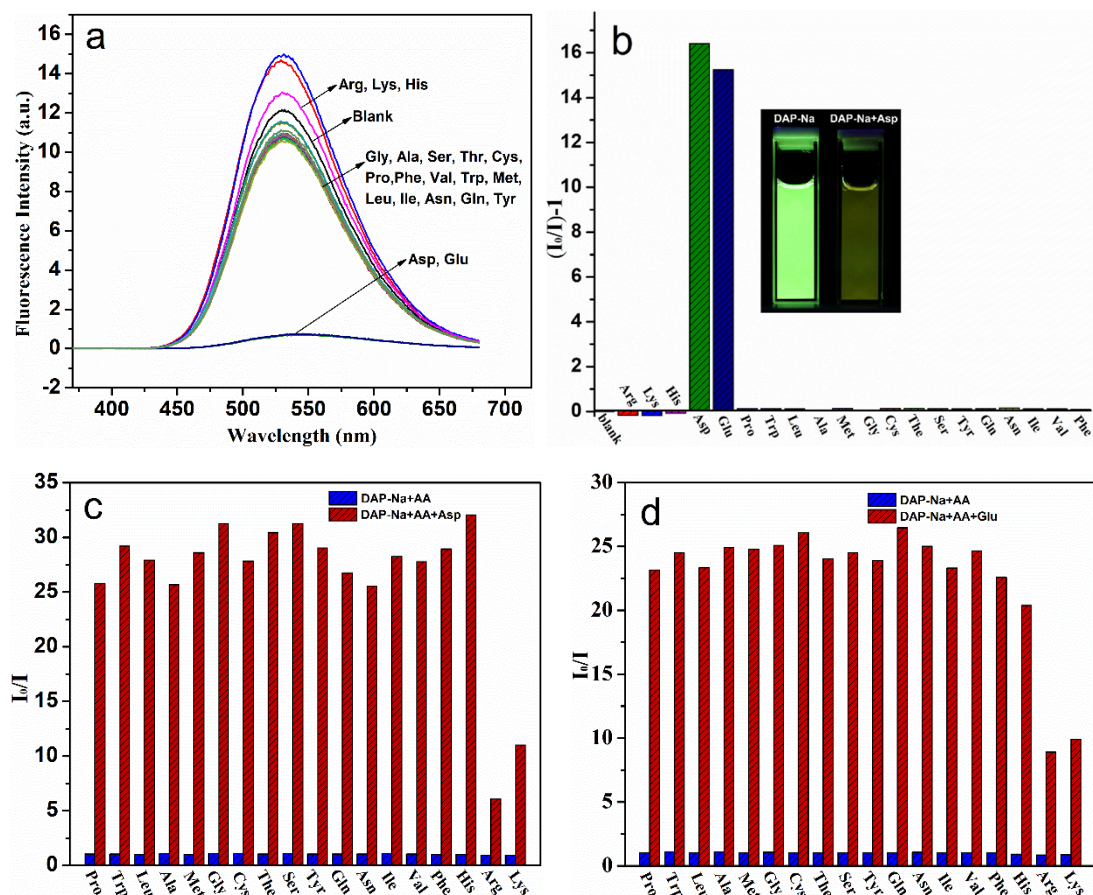

**Figure S7.** (a) Fluorescence emission spectra of **DAP-Na** in the absence and presence of various amino acids in water; (b) histogram style of fluorescence intensity changes, inset shows the photos of aqueous **DAP-Na** in the absence and presence of Asp under UV light ( $\lambda = 365$  nm); anti-interference capabilities of **DAP-Na** to detect Asp (c) and Glu (d) in the presence of various amino acids (**DAP-Na**:  $c = 20$   $\mu\text{M}$ , amino acids:  $c = 100$   $\mu\text{M}$ ).

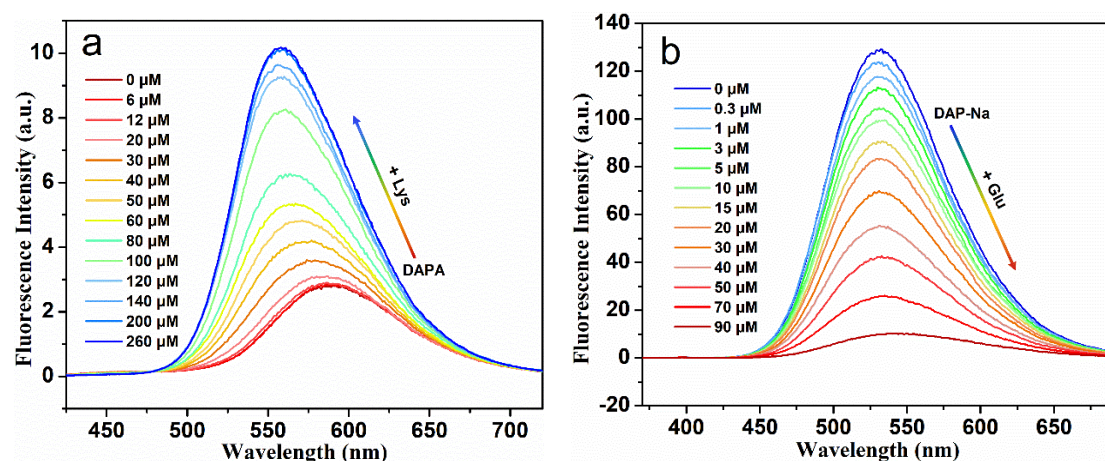

**Figure S8.** (a) Fluorescence emission spectra of **DAPA** upon titration of Lys (0 ~ 260  $\mu\text{M}$ , pH = 7.05-9.13) in water; (b) fluorescence variation of **DAP-Na** upon titration of Glu (0 ~ 90  $\mu\text{M}$ ) in water (**DAPA**:  $\lambda_{\text{ex}} = 365$  nm, **DAP-Na**:  $\lambda_{\text{ex}} = 350$  nm,  $c = 20.0$   $\mu\text{M}$ ).

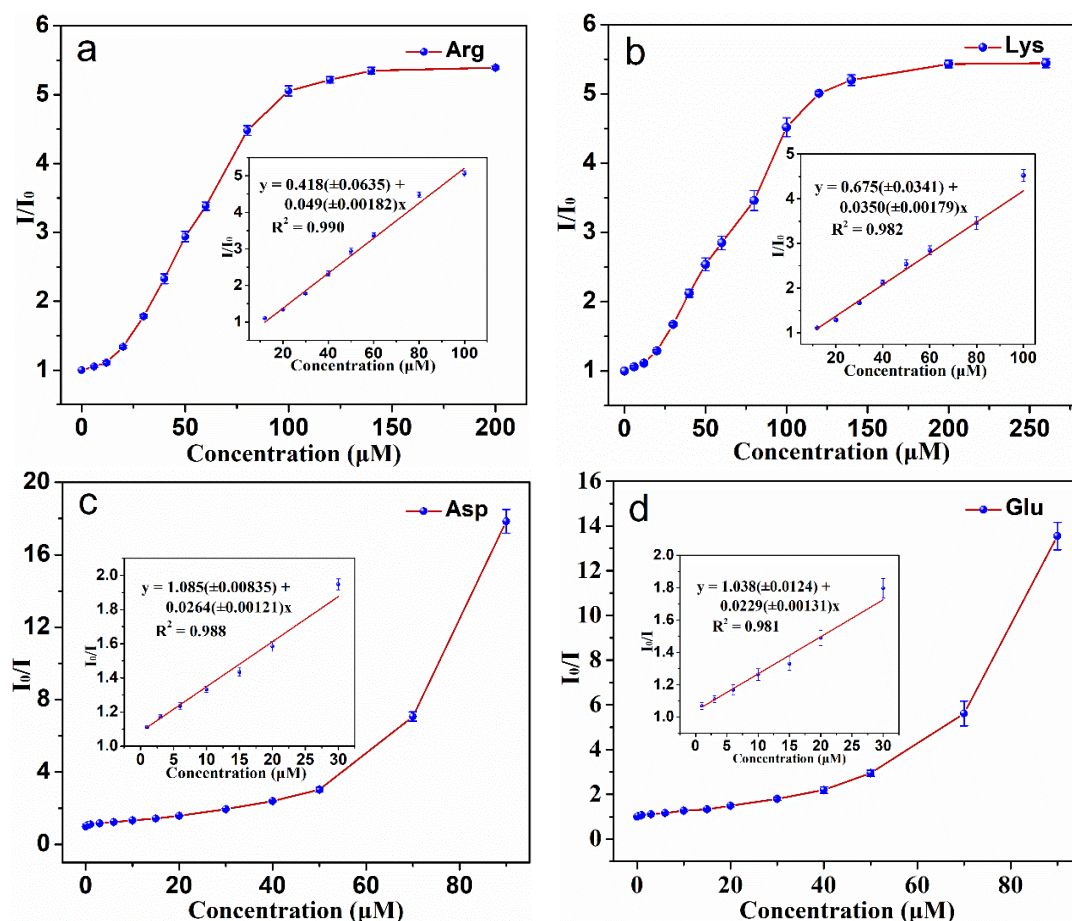

**Figure S9.** Fluorescence intensity ratio ( $I/I_0$ ) at 558 nm of **DAPA** versus the concentration of Arg (a) and Lys (b) (*Inset*: linear relationship between  $I/I_0$  and the concentration of Arg and Lys ranged from 12 to 100  $\mu\text{M}$ ); plots of fluorescence variation ( $I_0/I$ ) at 531 nm of **DAP-Na** as a function of Asp (c) and Glu (d) concentration (*Inset*: linear relationship between  $I_0/I$  and the concentration of Asp and Glu ranged from 1 to 30  $\mu\text{M}$ ).

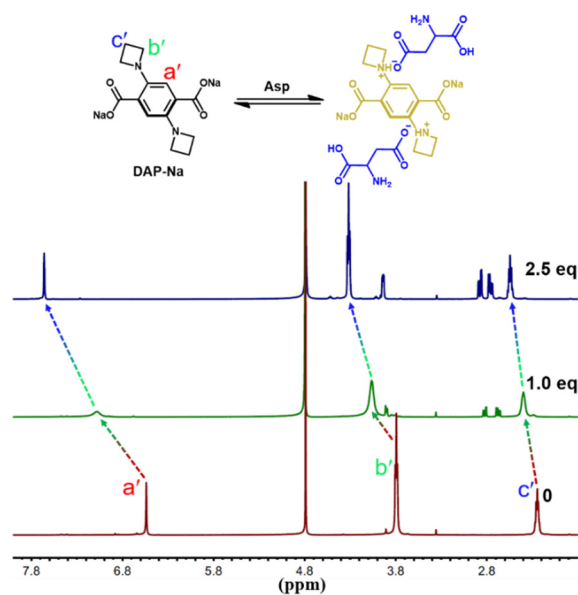

**Figure S10.** Partial  $^1\text{H}$  NMR spectra of **DAP-Na** upon addition of **Asp** in  $\text{D}_2\text{O}$ .

#### 4. Determination of the detection limits

Detection limits of **DAPA** and **DAP-Na** to basic amino acids (Arg and Lys) and acidic amino acids (Asp and Glu) were determined based on the fluorescence titration according to the following functions:

$$s_b = \sqrt{\frac{\sum_{i=1}^n (x_i - \bar{x})^2}{n-1}} \quad (1)$$

$$S = \frac{\Delta I}{\Delta c} \quad (2)$$

$$DL = \frac{3s_b}{S} \quad (3)$$

Firstly, the standard deviation ( $s_b$ ) was calculated by measuring the fluorescence intensity ( $x_i$ ) of the probe as blank solution for 11 times and then got the average intensity ( $\bar{x}$ ). By fitting the data into Function 1, the value of standard deviation was obtained. Secondly, a certain amount of analyte was added and the resulting variation of the fluorescence intensity ( $\Delta I$ ) was recorded. By fitting the data into Function 2, where  $\Delta I$  is the variation of intensity, and  $\Delta c$  is the variation of analyte concentration, the value of precision  $S$  was calculated. Finally, the detection limit (DL) was calculated according to Function 3.



## 5. Performance comparison of present probes with the reported works

**Table S2.** Performance comparison of **DAPA** and **DAP-Na** for detection of different amino acids with the recently reported probes.

|       | Chromophore                                                                         | Analyte | Approach                                   | Solution Media                                       | DL                                           | Reference                                                  |
|-------|-------------------------------------------------------------------------------------|---------|--------------------------------------------|------------------------------------------------------|----------------------------------------------|------------------------------------------------------------|
| No. 1 | 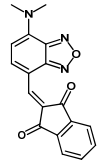   | Arg/Lys | “turn-on”<br>fluorescence/<br>colorimetry  | DMF/H <sub>2</sub> O (3/7)<br>mixture                | 1.39 $\mu$ M for Arg<br>1.10 $\mu$ M for Lys | <i>ACS Appl. Bio Mater.</i> <b>2021</b> , 4, 6558-6564     |
| No. 2 |    | Arg/Lys | “turn-on”<br>fluorescence/<br>colorimetry  | PBS buffer (1%<br>CH <sub>3</sub> CN)                | --<br>0.062 $\mu$ M for Lys                  | <i>J. Am. Chem. Soc.</i> <b>2020</b> , 142, 9231-9239      |
| No. 3 |    | Arg     | “turn-on”<br>fluorescence                  | DMSO                                                 | 2.24 $\mu$ M for Arg                         | <i>Sens. Actuators B. Chem.</i> <b>2019</b> , 290, 691-697 |
| No. 4 |   | Arg/Lys | “turn-on”<br>fluorescence/<br>colorimetry  | CH <sub>3</sub> CN/H <sub>2</sub> O<br>(9/1) mixture | --                                           | <i>Sens. Actuators B. Chem.</i> <b>2019</b> , 279, 400-409 |
| No. 5 |  | Asp/Glu | “turn-on”<br>fluorescence/<br>colorimetry  | DMSO/H <sub>2</sub> O<br>(3/97)                      | 1 $\mu$ M for Asp<br>5 $\mu$ M for Glu       | <i>Dyes Pigments</i> <b>2019</b> , 168, 111-122            |
| No. 6 |  | Arg     | “turn-off”<br>fluorescence/<br>colorimetry | CH <sub>3</sub> CN/H <sub>2</sub> O<br>(4/1) mixture | 2.2 $\mu$ M for Arg                          | <i>Sens. Actuators B</i> <b>2017</b> , 247, 26-35          |
| No. 7 |  | Arg/Lys | “turn-on”<br>fluorescence                  | Aqueous                                              | 0.50 $\mu$ M for Arg<br>0.41 $\mu$ M for Lys | Present Work                                               |
| No. 8 |  | Asp/Glu | “turn-off”<br>fluorescence                 | Aqueous                                              | 0.12 $\mu$ M for Asp<br>0.16 $\mu$ M for Glu | Present Work                                               |

## 6. NMR spectra of the compounds

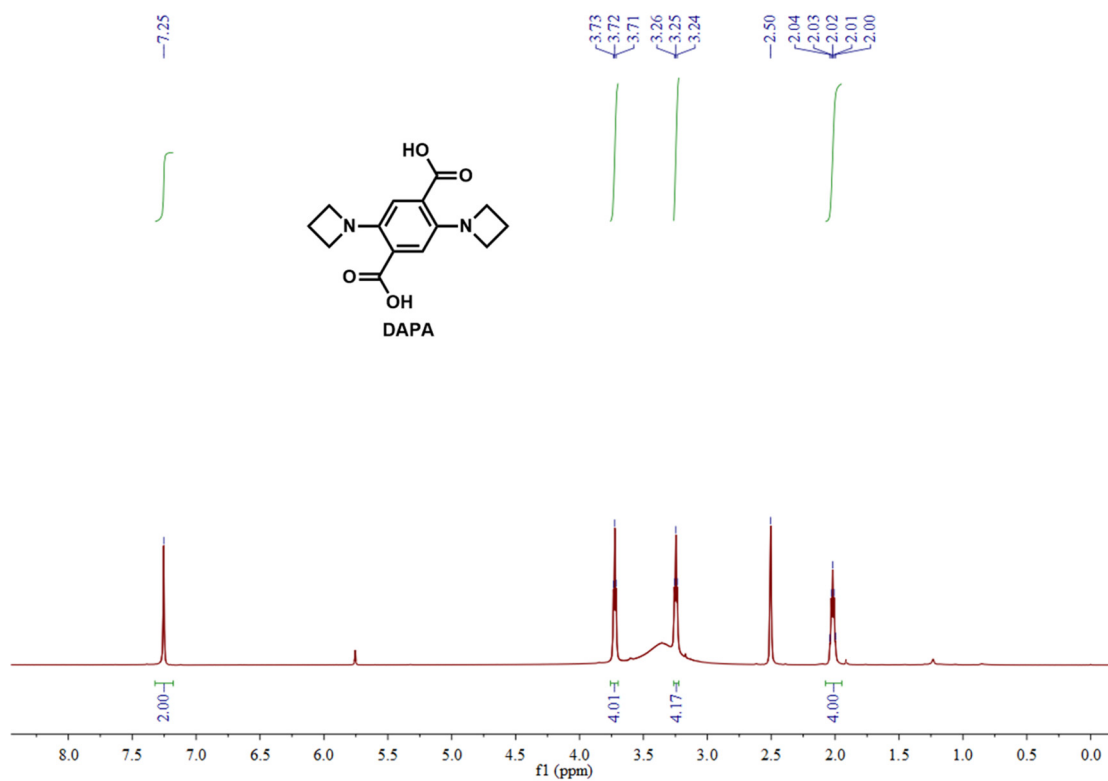

**Figure S11.**  $^1\text{H}$  NMR spectrum of **DAPA** in  $d_6$ -DMSO.

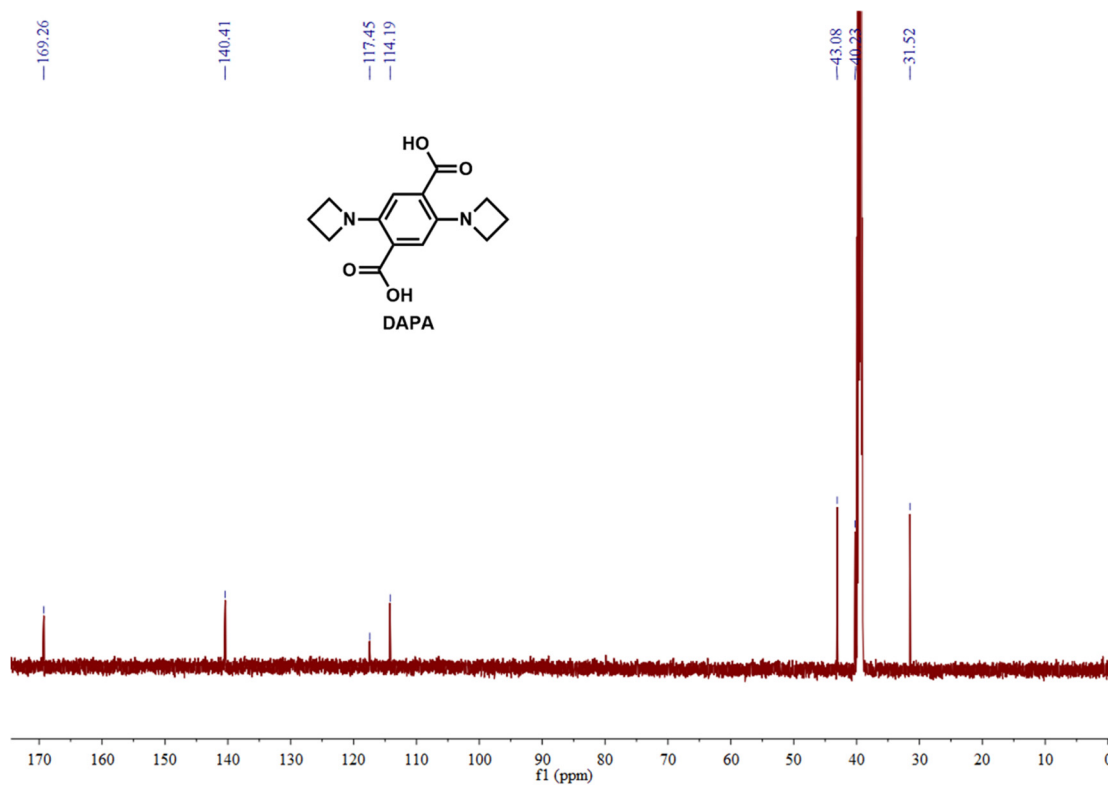

**Figure S12.**  $^{13}\text{C}$  NMR spectrum of **DAPA** in  $d_6$ -DMSO.

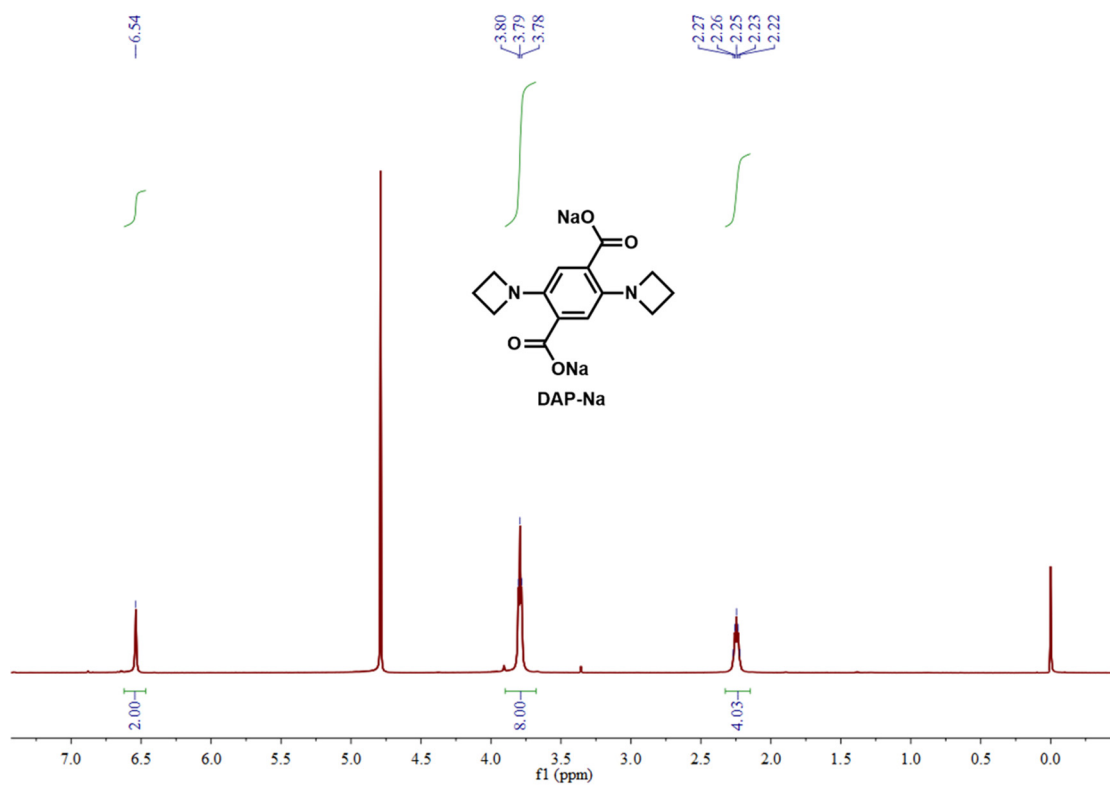

**Figure S13.** <sup>1</sup>H NMR spectrum of DAP-Na in D<sub>2</sub>O.

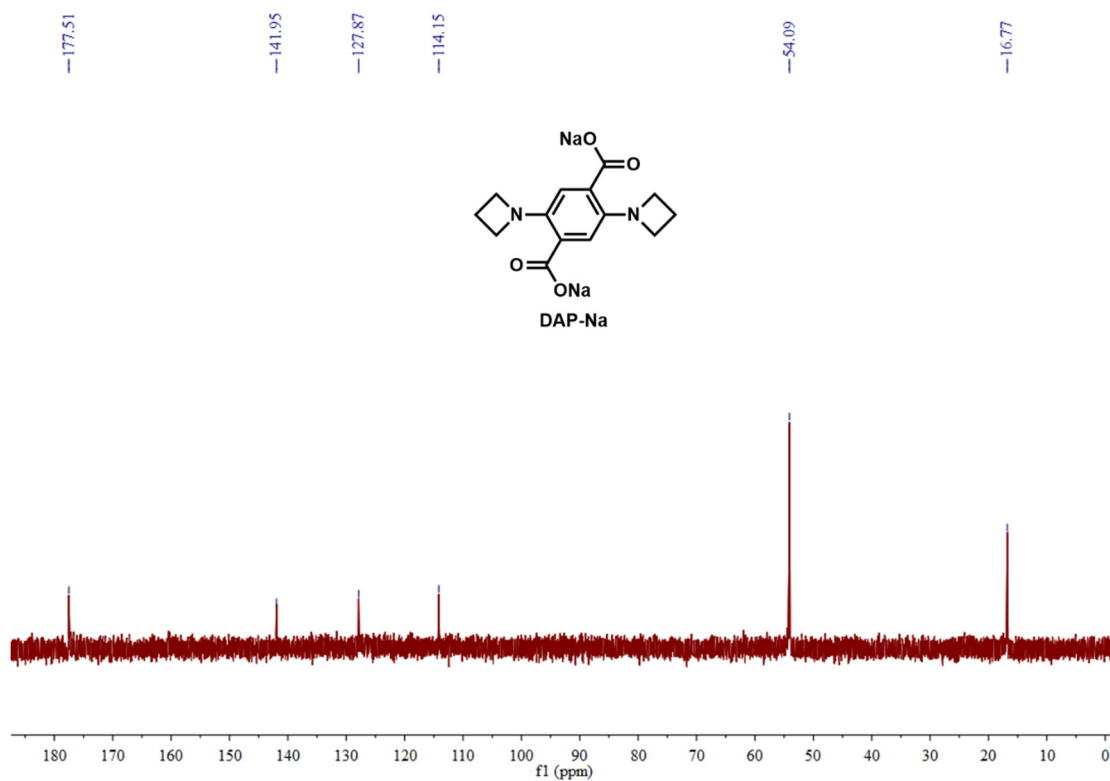

**Figure S14.** <sup>13</sup>C NMR spectrum of DAP-Na in D<sub>2</sub>O.

## 7. HRMS spectra of the compounds

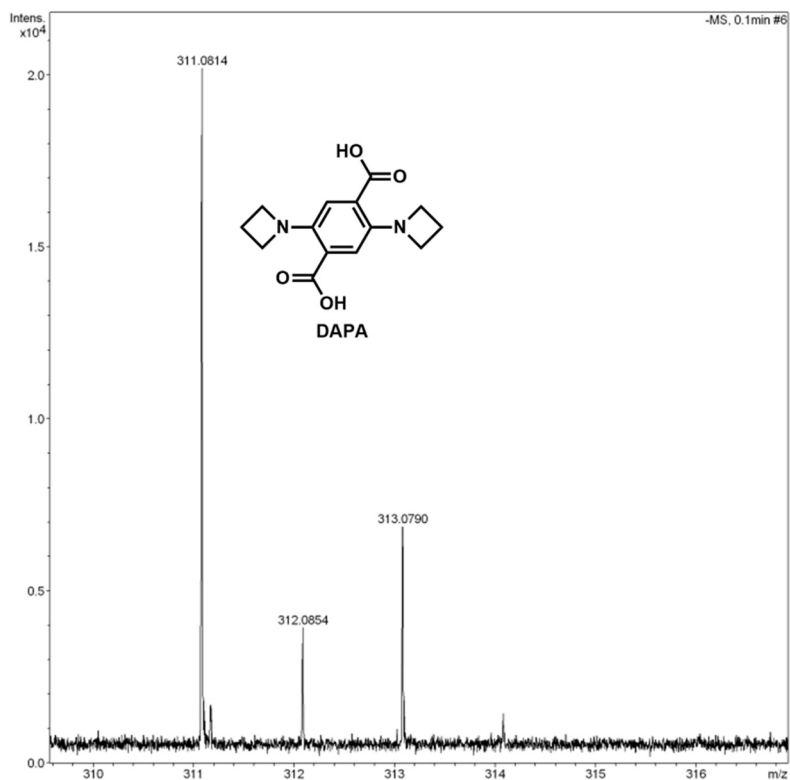

Figure S15. ESI-HRMS spectrum for DAPA.

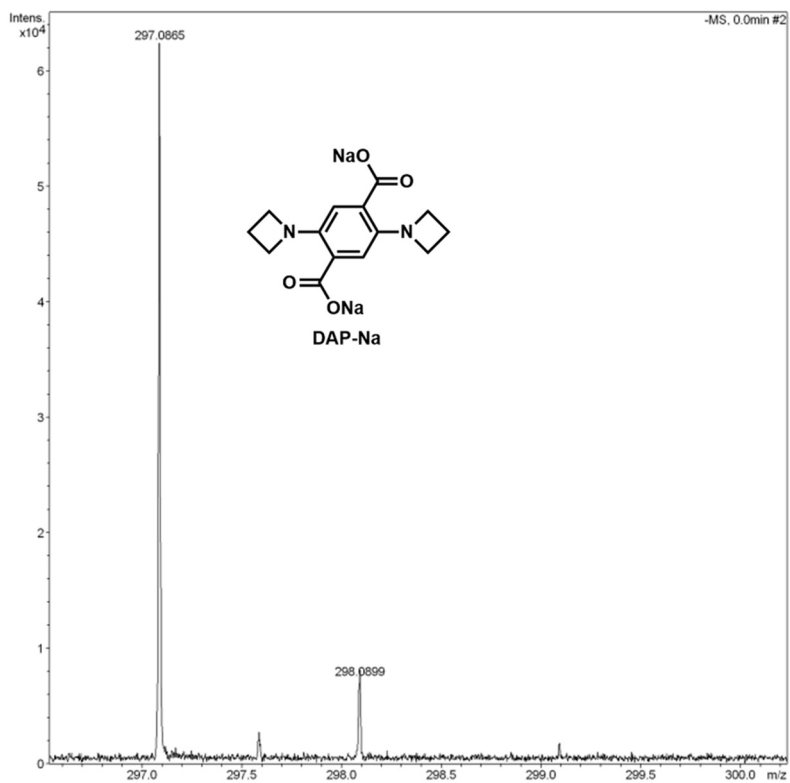

Figure S16. ESI-HRMS spectrum for DAP-Na.
